# Supplementary material for: Polyinfection in Fish Aeromoniasis: A Study of Co-Isolated Aeromonas Species in Aeromonas veronii Outbreaks
Source: MDPI journal article supplement (doi:10.3390/pathogens12111337), 2023-11-10
Supplement: s1 [file s1]

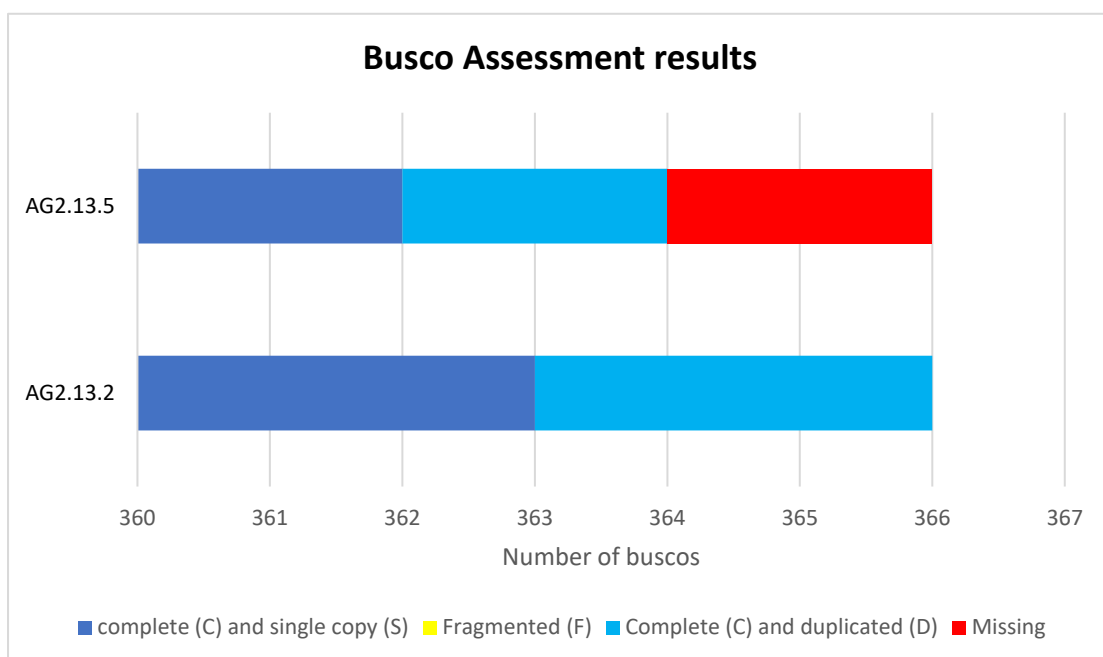

**Figure S1.** Busco Assessment results showing the number of copies of BUSCO genes complete (C = 366), complete and single copy (S = 363) complete and duplicated (D = 3), fragmented (F = 0) and missing (M = 0) (n = 366) in strain AG2.13.2 and complete (C = 364), complete and single copy (S = 362) complete and duplicated (D = 2), fragmented (F = 0) and missing (M = 2) (n = 366) in strain AG2.13.5.

**Table S1.** List of genomes downloaded from the NCBI- Characteristics of the strains selected for genome similarity assessments and comparisons.

| Strain                                    | GeneBank Assembly Accession number | Observations                                                        | Host/isolation source                 | Location                                       | Date of isolation          |
|-------------------------------------------|------------------------------------|---------------------------------------------------------------------|---------------------------------------|------------------------------------------------|----------------------------|
| <i>A. salmonicida</i> A527                | GCA_002764135.1                    | Mesophilic                                                          | <i>Macrobrachium rosenbergii</i>      | Mumbai, India                                  | May 2007                   |
| <i>A. salmonicida</i> Y47                 | GCA_001481535.2                    | Mesophilic                                                          | <i>Gallus domesticus</i>              | Mumbai, India                                  | January 2006 to March 2008 |
| <i>A. salmonicida</i> Y567                | GCA_001466435.1                    | Mesophilic                                                          | Fish                                  | Mumbai, India                                  | January 2006 to March 2008 |
| <i>A. salmonicida</i> Y577                | GCA_001481545.2                    | Mesophilic                                                          | Fish                                  | Mumbai, India                                  | January 2006 to March 2008 |
| <i>A. salmonicida pectinolytica</i> 34mel | GCA_000447435.2                    | Mesophilic, pigment producer                                        | Heavily polluted water, Matanza river | Buenos Aires, Argentina                        | 1988                       |
| <i>A. salmonicida</i> SWR-OG1             | GCA_012931585.1                    | Mesophilic                                                          | <i>Epinephelus coioides</i>           | Southern China Zhangzhou city, Fujian province | April 2018                 |
| <i>A. salmonicida</i> O23A                | GCA_002180335.1                    | Dissimilatory arsenate reductase gene                               | Rock biofilm and bottom sediments     | Zloty Stok gold mine in south-west Poland      | 2010                       |
| <i>A. salmonicida</i> S121                | GCA_002214245.1                    | Unavailable. Most likely belonging to <i>salmonicida</i> subspecies | <i>Salmo salar</i>                    | Yantai, China                                  | August 2015                |
| <i>A. salmonicida masoucida</i> RZ6S-1    | GCA_019443825.1                    | Intermediate                                                        | <i>Scophthalmus maximus</i>           | Yantai, China                                  | December 2016              |
| <i>A. salmonicida salmonicida</i> J409    | GCA_009858115.1                    | Unavailable                                                         | <i>Anoplopoma fimbria</i>             | British Columbia, Vancouver, Canadá            | 2018                       |

|                                                        |                                 |                                                    |                                                                    |                                |                |
|--------------------------------------------------------|---------------------------------|----------------------------------------------------|--------------------------------------------------------------------|--------------------------------|----------------|
| <i>A. salmonicida</i><br><i>salmonicida</i> A449       | GCA_000196395.1                 | Psychrophilic                                      | <i>Salmo trutta</i>                                                | Eure river, France             | 1975           |
| <i>A. salmonicida</i><br><i>salmonicida</i> SHY16-3432 | GCA_008370735.1                 | Psychrophilic                                      | <i>Salvelinus fontinalis</i>                                       | Quebec, Canada                 | 2016           |
| <i>A. salmonicida</i> ASI                              | GCA_029153695.1                 | Psychrophilic                                      | Duck meat                                                          | Shandong, China                | 2016           |
| <i>A. media</i> T0.1-19                                | <a href="#">GCA_013085485.1</a> | Misidentified                                      | Sludge from bioreactor treating oxytetracycline bearing wastewater | Beijing, China                 | April 2016     |
| <i>A. media</i> T5-1                                   | <a href="#">GCA_019455365.1</a> | Misidentified                                      | Biofilm of synthetic bioreactor under oxytetracycline stress       | Beijing, China                 | May 2017       |
| <i>A. media</i> E31                                    | <a href="#">GCA_016653695.1</a> |                                                    | Water                                                              | Jinan, China                   | May 2018       |
| <i>A. media</i> WS                                     | <a href="#">GCA_000287215.3</a> | High levels of melanin                             | Water                                                              | East Lake, Wuhan, Hubei, China | 2003           |
| <i>A. media</i> R25-3                                  | <a href="#">GCA_013085765.1</a> | Synthetic bioreactors under oxytetracycline stress | Sludge from bioreactor treating oxytetracycline bearing wastewater | Beijing, China                 | October 2017   |
| <i>A. media</i> R1-18                                  | <a href="#">GCA_013085725.1</a> | Synthetic bioreactors under oxytetracycline stress | Sludge from bioreactor treating oxytetracycline bearing wastewater | Beijing, China                 | May 2016       |
| <i>A. media</i> R1-26                                  | <a href="#">GCA_014109865.1</a> | Synthetic bioreactors under oxytetracycline stress | Biofilm reactor                                                    | China                          | July 2018      |
| <i>Aeromonas</i><br><i>rivipollensis</i> KN-Mc-11N1    | GCA_003015165.1                 |                                                    | <i>Myocastor coypus</i>                                            | Nakdong River, South Korea     | July 2017      |
| <i>Aeromonas</i><br><i>rivipollensis</i> G42           | GCA_010974915.1                 |                                                    | Water                                                              | Johannesburg, South Africa     | March 2018     |
| <i>Aeromonas veronii</i><br>bv <i>sobria</i> AG5.28.6  | GCA_003367135.1                 |                                                    | <i>Dicentrarchus labrax</i>                                        | East Aegean Sea, Greece        | November 2015  |
| <i>Aeromonas veronii</i><br>bv <i>sobria</i> BIOO050A  | GCA_004379215.1                 |                                                    | <i>Dicentrarchus labrax</i>                                        | East Aegean Sea, Greece        | 2009           |
| <i>Aeromonas veronii</i><br>bv <i>sobria</i> NS6.15.2  | GCA_004379225.1                 |                                                    | <i>Dicentrarchus labrax</i>                                        | West Aegean Sea, Greece        | November 2015  |
| <i>Aeromonas veronii</i><br>bv <i>sobria</i> NS        | GCA_003367145.1                 |                                                    | <i>Dicentrarchus labrax</i>                                        | West Aegean Sea, Greece        | 2009           |
| <i>Aeromonas veronii</i><br>bv <i>sobria</i> NS2       | GCA_004379205.1                 |                                                    | <i>Dicentrarchus labrax</i>                                        | West Aegean Sea, Greece        | September 2015 |
| <i>Aeromonas veronii</i><br>bv <i>sobria</i> NS13      | GCA_008119755.1                 |                                                    | <i>Dicentrarchus labrax</i>                                        | West Aegean Sea, Greece        | 2015           |
| <i>Aeromonas veronii</i><br>bv <i>sobria</i> NS22      | GCA_008119745.1                 |                                                    | <i>Dicentrarchus labrax</i>                                        | West Aegean Sea, Greece        | September 2016 |
| <i>Aeromonas veronii</i><br>bv <i>sobria</i> PDB       | GCA_003367105.1                 |                                                    | <i>Dicentrarchus labrax</i>                                        | West Aegean Sea, Greece        | 2009           |
| <i>Aeromonas veronii</i><br>bv <i>sobria</i> VCK1      | GCA_003367095.1                 |                                                    | <i>Dicentrarchus labrax</i>                                        | East Aegean Sea, Greece        | September 2015 |

Table S2. Statistics of the genome-assembly report.

| Strain                            | Platforms | Assembler        | Contigs | Largest Contig (bp) | N50     | GC%   | coverage | Number of reads |
|-----------------------------------|-----------|------------------|---------|---------------------|---------|-------|----------|-----------------|
| <i>A. salmonicida</i><br>AG2.13.2 | Illumina  | Unicycler v0.4.8 | 65      | 402.057             | 168.750 | 58.74 | 256.397  | 6214779         |

|                                     |          |                     |    |         |         |       |        |         |
|-------------------------------------|----------|---------------------|----|---------|---------|-------|--------|---------|
| <i>A. rivipollensis</i><br>AG2.13.5 | Illumina | Unicycler<br>v0.4.8 | 50 | 501.196 | 288.897 | 61.61 | 243.19 | 5502017 |
|-------------------------------------|----------|---------------------|----|---------|---------|-------|--------|---------|

Table S3. A. salmonicida AG2.13.2 CRISPR site prediction.

11

| CRISPR ID | Start  | End    | Length(bp) | Number of<br>spacers | Direct repeat<br>length(bp) |
|-----------|--------|--------|------------|----------------------|-----------------------------|
| CRISPR2   | 396098 | 396417 | 319        | 5                    | 23                          |

Table S4. A. salmonicida AG2.13.2 PHASTER prediction.

12

| PHASTER region         | Start   | End     | Length(bp) | Number of Phage<br>Hit Proteins |
|------------------------|---------|---------|------------|---------------------------------|
| INCOMPLETE<br>PROPHAGE | 4627372 | 4669096 | 41,700 pb  | 41                              |

13
